1 **Title:** A New Foundation Model's Accuracy in Glaucoma Detection using Ocular Coherence Tomography Images  
2 **Authors:** Benton Chuter<sup>1</sup>, Justin Huynh<sup>1,2</sup>, Evan Walker<sup>1</sup>, Shahin Hallaj<sup>1</sup>, Jalil Jalili<sup>1</sup>, Jeffrey Liebmann<sup>3</sup>, Massimo  
3 A Fazio<sup>4</sup>, Christopher A. Girkin<sup>4</sup>, Robert N. Weinreb<sup>1</sup>, Mark Christopher<sup>1</sup>, Linda M. Zangwill<sup>1</sup>  
4 1: Hamilton Glaucoma Center, Viterbi Family Department of Ophthalmology, University of California, San Diego,  
5 La Jolla, CA, United States  
6 2. School of Medicine, University of Illinois Urbana-Champaign, Urbana, IL, United States.  
7 3. Department of Ophthalmology, Harkness Eye Institute, Bernard and Shirlee Brown Glaucoma Research  
8 Laboratory, New York, NY, United States.  
9 4: Department of Ophthalmology and Vision Sciences, University of Alabama at Birmingham, Birmingham, AL,  
10 United States

11  
12  
13 **Running Head:** Glaucoma Classification Using RETFound OCT

14 **Corresponding Author:**

15 Linda M. Zangwill, Ph.D.

16 Professor

17 Richard K. Lansche M.D. and Tatiana A. Lansche Endowed Chair

18 Hamilton Glaucoma Center

19 Shiley Eye Institute

20 Viterbi Family Department of Ophthalmology -0946

21 University of California, San Diego

22 9500 Gilman Drive

23 La Jolla, CA 92093-0946

24 Phone: (858) 534-7686

25 [lzangwill@health.ucsd.edu](mailto:lzangwill@health.ucsd.edu)

26

27 **Address for reprints:**

28 Linda M. Zangwill, Ph.D.

29 Hamilton Glaucoma Center

30 9415 Campus Point Drive

31 Room 175

32 La Jolla, CA 92037

33

34

35

36 **Precis**

37 The study found high accuracy for glaucoma detection from OCT optic nerve head RNFL scans in a diverse study  
38 population by adapting an existing foundation model (RETFound). Performance improved with larger datasets and  
39 more training cycles, achieving an AUC of 0.91 with RNFL scans alone. Results suggest RETFound is promising  
40 for automated OCT RNFL-based glaucoma detection across demographics and training conditions.

41

42 **Abstract**

43 **Purpose:** To fine tune and evaluate the performance of the retinal foundation model (RETFound) on a diverse  
44 longitudinal clinical research dataset in glaucoma detection from optical coherence tomography (OCT) RNFL scans.  
45 Subanalyses of the model performance were evaluated across different subgroups, various dataset sample sizes and  
46 training cycles (epochs).

47

48 **Design:** Evaluation of a diagnostic technology

49

50 **Subjects, Participants, and Controls:** 15,216 Spectralis OCT RNFL circle scans of 747 individuals of diverse race  
51 (56.9% White, 37.8% Black/African American, and 5.3% Other/Not reported, glaucoma severity (30.8% mild,  
52 18.4% moderate-to-severe, and 50.9% no glaucoma), and age (44.8% <60 years, 55.2% >60 years) from the  
53 Diagnostic Innovations in Glaucoma Study (DIGS) and the African Descent and Glaucoma Evaluation Study  
54 (ADAGES). All OCT scans were labeled as "Non-glaucomatous" or "Glaucomatous."

55

56 **Methods:** RETFound was employed to perform binary glaucoma classification. The diagnostic accuracy of  
57 RETFound was iteratively tested across different combinations of dataset sample sizes (50 to 2000 OCT RNFL  
58 circle scans), epochs (5 to 50), and study subpopulations stratified by severity of glaucoma, age, and race).

59

60 **Main Outcome Measures:** Area under receiver operating characteristic curve (AUC) for classifying RNFL scans as  
61 "Non-glaucomatous" or "Glaucomatous."

62

63 **Results:** Performance metrics improved with larger training datasets and more training cycles, rising from an AUC  
64 of 0.61 (50 training images and 5 epochs) to AUC 0.91 (2,000 training images and 50 epochs). Gains in performance  
65 were marginal as training size increased beyond 500 scans. Performance was similar across race for all training size  
66 and cycle number combinations: African American (AUC=0.90) vs other (AUC=0.93). RNFL scans from older  
67 patients (>60 years) led to worse performance (AUC=0.85) compared to younger patients (<60 years, AUC=0.95).  
68 Performance was significantly higher for RNFL scans from patients with moderate-to-severe glaucoma vs mild  
69 glaucoma (AUC=0.99 vs 0.88, respectively).

70  
71 **Conclusions:** Good RETFound performance was observed with a relatively small sample size of images used for  
72 fine tuning and across differences in race and age. RETFound's ability to adapt across a range of OCT training  
73 conditions and populations suggests it is a promising tool to automate glaucoma detection in a variety of use cases.

74  
75 **Keywords:**

76 Foundation Model, Deep Learning, Glaucoma, Artificial Intelligence, RETFound, Self-Supervised Learning, Ocular  
77 Coherence Tomography

78

79 **Introduction**

80 Glaucoma, a leading cause of blindness worldwide, is characterized by progressive optic neuropathy that  
81 can lead to irreversible vision loss if not detected and managed early.<sup>1,2</sup> Optical coherence tomography  
82 (OCT) is fundamental in the diagnosis and monitoring of glaucoma, providing high-resolution cross-  
83 sectional images of the retina essential for detecting structural abnormalities associated with various eye  
84 conditions.<sup>3,4</sup> However, the reliance on expert clinicians to interpret OCT images poses both substantial  
85 clinician time burden as well as issues with inter-physician variability in assessment, demonstrating the  
86 need for reliable automated systems.<sup>5</sup>

87  
88 The advent of artificial intelligence (AI) promises to revolutionize ophthalmology by addressing these  
89 issues to aid in the diagnosis and monitoring of glaucoma.<sup>6,7</sup> Recent studies have leveraged artificial  
90 intelligence and deep learning (DL) techniques to enhance glaucoma detection using OCT images,  
91 demonstrating promising results.<sup>8-12</sup> For instance, Akter et al. employed VGG16, SqueezeNet, and  
92 ResNet18 models on a dataset of 780 segmented and 780 raw TSNIT OCT B-scans, resulting in an AUC  
93 of 0.93 on test data.<sup>13</sup> Another multi-institutional study developed a DL model to diagnose early-onset  
94 glaucoma using spectral-domain OCT images. Pre-trained on 4,316 OCT images from 1,371 eyes with  
95 open-angle glaucoma and 193 normal eyes, and then trained on a dataset from 94 patients with early  
96 glaucoma and 84 normal subjects, the model achieved an AUC of 0.937, outperforming random forests  
97 and support vector machine models.<sup>14</sup> Moreover, another study evaluated various training strategies for  
98 DL models and explored the influence of demographic and clinical factors from the study groups on the  
99 efficacy of glaucoma detection from optic disc images. It contrasts the effectiveness of deep learning  
100 algorithms by two independent investigators in different glaucoma populations, showing optimal  
101 performance with AUCs of 0.92 for any glaucoma, 0.91 for mild glaucoma, and 0.98 for moderate-to-  
102 severe glaucoma across significant datasets like DIGS/ADAGES and the Matsue Red Cross Hospital  
103 (MRCH) datasets, involving varied patient demographics from the U.S. and Japan.<sup>12</sup>

104 However, these DL models often require large, high-quality labeled datasets for effective training, which  
105 are not universally available and are resource-intensive to produce.<sup>12,15</sup> This reliance on specialist-  
106 annotated data limits their scalability and applicability in diverse clinical settings.<sup>12,15</sup>

107  
108 Self-supervised learning (SSL) helps address this labeling issue. SSL enhances data utilization by  
109 extracting features without the need for ground truth labels, creating versatile feature representations for  
110 various applications.<sup>16-18,19</sup> Using large pools of unlabeled data, this approach can train robust,  
111 generalizable models that can be adapted for a variety of tasks and can outperform supervised learning  
112 methods in classification tasks.<sup>20,21</sup> This characteristic makes SSL-based models a promising approach for  
113 medical applications with limited labeled data.<sup>22,23</sup>

114  
115 Recently, an SSL-based foundation model that was trained on a large number (>1.6 million) of  
116 ophthalmic images, RETFound, was described.<sup>24</sup> A primary intended use of foundation models such as  
117 RETFound is to serve as a starting model that can then be adapted and/or fine-tuned to perform a specific  
118 task of interest without needing a restrictively large or expensive training dataset.<sup>24</sup> Preliminary  
119 evaluations of RETFound show its utility across multiple diseases, tasks, and imaging modalities.  
120 However, its development and testing have been primarily confined to publicly available datasets with  
121 inconsistent image and label quality and an initial dataset from the UK. To ensure its robustness and  
122 applicability in real-world settings, it is crucial to further validate RETFound using larger, more diverse  
123 datasets from multiple regions and demographic groups.

124  
125 To address this need, our research focuses on a validation study of RETFound using a comprehensive  
126 dataset of OCT images from eyes with and without glaucoma. This study assesses RETFound's  
127 performance in detecting glaucoma using OCT optic nerve head (ONH) circle scans from our unique,  
128 diverse dataset. We explore the number of images and training iterations required for fine-tuning  
129 RETFound to achieve high accuracy in this new context. Our investigation tests RETFound's ability to

130 detect glaucoma using OCT images, examining the impact of varying training durations and data  
131 volumes. Additionally, we assess its generalizability across different ethnicities, ages, and stages of  
132 disease to understand its performance, variability, and applicability in glaucoma detection.

133

## 134 **Methods**

### 135 **Data Collection**

136 This research used OCTs from the Diagnostic Innovations in Glaucoma Study (DIGS, [clinicaltrials.gov](https://clinicaltrials.gov)  
137 ID: NCT00221897)<sup>25</sup> and the African Descent and Glaucoma

138 Evaluation Study (ADAGES, [clinicaltrials.gov](https://clinicaltrials.gov) ID: NCT00221923).<sup>26</sup> The recruitment process and  
139 methodology were approved by the institutional review boards at each participating site, adhering to the  
140 ethical standards outlined in the Declaration of Helsinki and the Health Insurance Portability and  
141 Accountability Act. All subjects provided informed consent during recruitment. While comprehensive  
142 descriptions of these studies have been presented in earlier publications,<sup>25,26</sup> the critical aspects pertinent  
143 to this work are highlighted below.

144

145 The DIGS and ADAGES studies are a joint initiative between multiple institutions: the University of  
146 California San Diego Hamilton Glaucoma Center and Viterbi Family Department of Ophthalmology, the  
147 University of Alabama at Birmingham Department of Ophthalmology, and the Columbia University  
148 Medical Center Edward S. Harkness Eye Institute. The participants in these studies are a diverse mix of  
149 individuals with African, European, and Asian heritage. The studies' protocols involve biannual collection  
150 of OCT photographs, stereo fundus images, and visual field (VF) tests as part of their ongoing research.

151

152 This analysis included a total of 15,216 Spectralis (Heidelberg Engineering GmbH, Heidelberg,  
153 Germany) OCT images of 747 participants (1231 eyes), taken from 2008 to 2019. It included macula-  
154 centered posterior pole scans from the Glaucoma Module Premier Edition, which consisted of 61 B-scans,  
155 each with 768 A-scans, covering a 30° × 25° region. Quality assessment for the SD-OCT images was

156 conducted by the University of California, San Diego Imaging Data Evaluation and Analysis Reading  
157 Center following standardized protocols. Any SD-OCT images with low signal quality or those  
158 containing artifacts were discarded.

159  
160 VF assessments were carried out with the Humphrey Field Analyzer II, using the 24-2 test pattern and the  
161 Swedish Interactive Thresholding Algorithm standard testing algorithm. Tests with fixation losses, false-  
162 negative, or false-positive errors exceeding 33% were discarded. To gauge the severity of glaucoma  
163 damage at the time of imaging, the mean deviation (MD) from the VF test taken closest to the time of  
164 image capture, and within a year, was used for all ONH images.

165

#### 166 **Glaucoma Labels**

167 Ground truth glaucoma status required patients to have both repeatable glaucomatous visual field damage  
168 (GVFD) and glaucomatous optic neuropathy (GON). Eyes from patients who had neither GVFD or GON  
169 were labeled as “non-glaucomatous.” In determining GON, stereophotographs underwent review by two  
170 independent, blinded graders using a stereoscopic viewer. If the two graders disagreed, a third  
171 experienced grader adjudicated. GVFD was defined as a VF PSD ( $P < 0.05$ ) and/or Glaucoma Hemifield  
172 Test outside normal limits on at least two consecutive tests. Glaucomatous eyes were further categorized  
173 into two groups based on the severity of glaucoma as indicated by 24-2 VF mean deviation (MD).  
174 Patients with an MD of -6.0 or worse decibels (dB) were classified as having "moderate-to-severe"  
175 glaucoma, while those with a VF MD better than -6.0 dB were categorized as having "mild" glaucoma.

176

#### 177 **Image Preprocessing**

178 SD-OCT images were resized to a uniform  $224 \times 224$  pixel dimension to meet the input requirements for  
179 RETFound. This resolution also has proven sufficient for diagnosing primary open-angle glaucoma  
180 (POAG) in earlier experiments.<sup>27</sup>

181

## 182 **Evaluation of RETFound using OCTs for glaucoma label assignment**

183 We assessed the practical use and performance of RETFound in detecting glaucoma from these  
184 preprocessed OCT images. We conducted comprehensive iterative testing to measure RETFound's  
185 performance, captured as the area under the receiver operating characteristic (AUC), to predict glaucoma  
186 status. This involved training RETFound with different datasets of OCT images varying in size (50, 100,  
187 200, 500, 1,000, 2,000) and for different numbers of training epochs (5, 10, 20, 50). Through this  
188 approach, we aimed to determine whether RETFound could achieve or exceed the performance of other  
189 deep learning models in classification tasks with relatively minimal training (fine-tuning) on smaller,  
190 labeled datasets. Additionally, we evaluated whether RETFound's results were generalizable across  
191 differences in glaucoma severity, age, and race.

192

## 193 **Number of Images Variation & Dataset Split**

194 A total of 15216 images from 747 patients were randomized into training (10708 images from 512  
195 patients), validation (1497 images from 99 patients), and test (3011 images from 212 patients) pools using  
196 a standard 70-10-20 patient-based split (as illustrated in Figure 1). Demographic information for the entire  
197 dataset and for each of these pools is available in Table 1. RETFound was then evaluated across various  
198 dataset sizes (50, 100, 200, 500, 1,000, 2,000) and epochs (5, 10, 20, 50), totaling 24 size-epoch  
199 combinations. These specific ranges were selected after initial testing indicated they provided a  
200 comprehensive spectrum of model performance, from subpar to optimal.

201

202 For each of these size-epoch combinations, models were trained, validated, and tested on subsets  
203 randomly sampled from the predetermined training, validation, and test pools in a 70-10-20 ratio. The  
204 total number of images reported represented the current size for the specific size-epoch combination being  
205 evaluated (number of training samples + number of validation samples = current size), as shown in Figure  
206 1. To account for and assess variability across different training runs, each size-epoch combination  
207 underwent 10 separate training runs, with the sampling process repeated for each. For each of these



208 training runs, an additional 100 bootstrap runs were performed, resulting in a total of 240 training runs  
209 and 24,000 bootstrap runs. Further implementation details are provided in Supplementary Table 2.

210

## 211 **Analysis**

212 Given the balanced distribution of glaucoma cases within the DIGS/ADAGES dataset (as outlined in  
213 Table 1), each run's performance was measured using the area under the receiver operating characteristic  
214 (AUC). 95% confidence intervals (CIs) for these were calculated using a cumulative density function,  
215 sorting the bootstrapped estimates and selecting the values corresponding to the 2.5th and 97.5th  
216 percentiles to determine the CI range. This approach effectively captures variability between runs,  
217 especially when the image count is high. The generalizability of the models was also assessed by  
218 stratifying the results by race (Black vs. non-Black), age (<60 years vs.  $\geq$ 60 years), and severity of  
219 glaucoma (MD >-6.0 dB vs. MD  $\leq$ -6.0 dB).

220

## 221 **Results**

222 This study included 15216 images from 747 subjects and 1232 eyes, divided into subsets for testing (3011  
223 images from 212 subjects and 356 eyes), training (10708 images from 512 subjects and 812 eyes), and  
224 validation (1497 images from 99 subjects and 167 eyes), as shown in Table 1. The average age of  
225 participants in the study is 60.3 years, with 44.8% (n=335) under 60 years of age and 55.2% (n=412) over  
226 60 years. Females (n=438, 58.6%) outnumber males (n=309, 41.4%). The majority of the study  
227 population is White (56.9%, n=425), followed by Black (37.8%, n=282) and Asian (3.9%, n=29)  
228 individuals. The racial status for 6 (0.8%) participants was unspecified or unrecorded. Eye-level  
229 characteristics such as VF MD, axial length, spherical equivalent, intraocular pressure (IOP), and central  
230 corneal thickness (CCT) are documented for the training, validation, and test sets in Table 1. 30.8%  
231 (n=379) of patients' eyes indicated mild glaucoma (VF MD >-6 dB) compared to 18.4% (n=226) with  
232 moderate-to-severe glaucoma (VF MD <-6 dB), while 50.9% (n=626) had no glaucoma. The datasets are

233 evenly distributed between the two outcomes of interest at the latest visit: Glaucoma (n=605, 49.1%) and  
234 Not Glaucoma (n=626, 50.9%).

235  
236 Table 2, Figure 2, and Supplementary Figures S1 and S2 demonstrate the model's performance across  
237 various epoch and OCT image sample size combinations. Increases in either epoch count or sample size  
238 were associated with increased performance, however, sample size had a larger impact than epoch count.  
239 Across all epochs, as the image count grew from 50 to 2000, the AUC also increased; at a constant of 50  
240 epochs, this increase ranges from 0.64 at 50 images to 0.85 at 200 images and 0.91 at 2000 images. At a  
241 constant sample size of 2,000 images, AUC increased from 0.86 at 5 epochs to 0.91 at 50 epochs. The rate  
242 of improvement diminished as the sample size increased, with large gains in performance when moving  
243 from 50 to 500 images and relatively small gains when adding additional images after 500.

244  
245 The 95% confidence intervals for AUC narrow with the increase in the number of images, indicative of  
246 higher confidence in the AUC values with larger datasets; at a constant 50 epochs, the 95% CI range is  
247 0.37 at 50 epochs, 50 images and decreases to 0.12 at 50 epochs, 2000 images. This narrowing of 95%  
248 CIs with the increased sample size and epoch count indicates better model stability and performance  
249 consistency, as more data is available for training over greater numbers of epochs. An increase in the  
250 number of images appears to have a larger effect than a proportional increase in epochs. For 2000 training  
251 and validation images, the CI range only decreases from 0.14 at 5 epochs to 0.12 at 50 epochs. Model  
252 performance at 2000 images, over 50 epochs, consistently achieves excellent performance with a mean  
253 AUC of 0.91.

254  
255 Model performance was also assessed in relation to demographic factors (Table 2, Figure 3 and  
256 Supplemental Figure 3) across sample sizes and epoch numbers. With respect to age groups (<60 years  
257 vs. ≥60 years), AUCs were comparable at small sample sizes, but AUC was consistently higher in the <60  
258 years group at larger sample sizes (0.95 (0.83 – 0.99) vs. 0.85 (0.73 – 0.93) at 2,000 images and 50

259 epochs). These differences were not statistically significant. Similarly in comparing racial groups (Black /  
260 African American vs. White), results were comparable at small sample sizes, but AUC slightly in the  
261 White participants at larger sample sizes (0.93 (0.84 – 0.97) vs. 0.90 (0.76 – 0.98) at 2,000 images and 50  
262 epochs). Again, these differences were not statistically significant. Finally, with respect to disease  
263 severity, AUC was consistently higher for the moderate-to-severe group than the early glaucoma group  
264 (0.95 (0.83 – 0.99) vs. 0.85 (0.73 – 0.93) at 2,000 images and 50 epochs). These results were statistically  
265 significant at the 500, 1,000, and 2,000 sample size cases across all epoch numbers (0.93 (0.84 – 0.97) vs.  
266 0.90 (0.76 – 0.98) at 2,000 images and 50 epochs).

267

## 268 **Discussion**

269 RETFound demonstrates strong diagnostic performance for OCT images, benefiting from larger datasets  
270 and longer training times. Its efficiency and accuracy make it a promising tool for clinical applications.  
271 The performance of RETFound varied with the number of images and epochs during training and was  
272 generalizable across differences in age and race. As the number of images and epochs increases, there is a  
273 general trend of improvement in diagnostic accuracy, with limited improvement in diagnostic accuracy  
274 after increasing the sample size from 500 (average AUC 0.87, 25.0 patients, 40.1 eyes) to 1000 (average  
275 AUC 0.90, 50.0 patients, 80.2 eyes) images. This suggests that although RETFound benefits from a larger  
276 volume of data and extended training, good diagnostic performance is possible with relatively small  
277 sample sizes. Likely because this foundation model is pre-trained on a large dataset using a self-  
278 supervised approach, it is able to acquire strong prior knowledge of informative retinal image features,  
279 allowing for efficient fine-tuning using smaller sample sizes and fewer epochs to achieve strong  
280 performance.

281

282 RETFound matches or exceeds the performance of previously developed convolutional neural networks  
283 (CNNs) based DL methods while requiring significantly fewer samples for training.<sup>28</sup> When trained for 50  
284 epochs on 200 images, it begins to approach the performance of ResNet-50, which was trained on much

285 larger DIGS/ADAGES OCT datasets comprising tens of thousands of images while using a similar  
286 definition of glaucoma (GVFD and GON) as well as comparable distribution of severity of disease.<sup>28</sup>  
287 Specifically, RETFound achieves an AUC of 0.87 (95% CI: 0.77–0.93) with just 500 images, matching  
288 the performance of the prior CNN (AUC = 0.86, 95% CI: 0.84–0.87, n=25,751).<sup>28</sup> Additionally,  
289 RETFound surpasses previous CNNs when trained and validated on more than 500 images, achieving an  
290 AUC of 0.90 (95% CI: 0.83–0.95) for 1000 images. Even with only 20 epochs of training, RETFound  
291 exceeds the performance of prior CNNs with an AUC of 0.88 (95% CI: 0.80–0.93) when trained on 1000  
292 OCT images. RETFound OCT also shows comparable if not superior performance to previous CNNs  
293 using ONH fundus images. Specifically, RETFound OCT achieved an AUC of 0.91 (95% CI: 0.83–0.95)  
294 when trained and validated on only 2000 OCT images, similar to the AUC of 0.91 (95% CI: 0.89–0.92)  
295 reported for CNNs trained on 20,828 ONH fundus images.<sup>28</sup>

296  
297 RETFound's performance also compares favorably to previous transformer models applied to the  
298 DIGS/ADAGES dataset. While a transformer model achieved an AUC of 0.92 on 22,464 OCT images  
299 from the DIGS/ADAGES dataset,<sup>29</sup> RETFound achieved similar results with an AUC of 0.91 (95% CI:  
300 0.83–0.95) using just one-tenth of the data. This outcome demonstrates RETFound's efficiency, as it  
301 requires fewer labeled training samples to match or surpass the performance of prior approaches,  
302 benefiting from both increased training time and sample size.

303  
304 In the original study,<sup>24</sup> RETFound's application to a publicly available dataset for glaucoma classification  
305 yielded comparable or mildly inferior outcomes compared to its performance following fine-tuning on the  
306 clinical DIGS/ADAGES dataset. This includes glaucoma detection on the PAPILA dataset, for which  
307 they reported a mean AUC of 0.86 (0.84, 0.87).<sup>24</sup> However, it should be noted that the original study did  
308 not directly test RETFound's performance with OCT for glaucoma prediction, only fundus images for  
309 Glaucoma and "Multi-class disease", such that a direct comparison cannot be cleanly made.

310

311 Further, discrepancies in performance may result from various factors, including variations in ground  
312 truth definition of glaucoma disease severity, study population, image quality, or other elements.<sup>30</sup>  
313 Numerous studies have reported high accuracy in glaucoma detection; however, direct comparisons  
314 across studies can be difficult due to data source differences, including variations in disease severity,  
315 which is often not reported despite its significant impact on accuracy.<sup>7,31</sup> In particular, accuracy for  
316 identifying mild glaucoma is often substantially lower than identifying moderate-to-severe disease,<sup>12,32</sup> as  
317 shown in this work, where mean AUC for detecting moderate-or-severe glaucomatous disease rose to  
318 0.99 (0.95, 1.00) at 2000 images and 50 epochs, compared to 0.88 (0.79, 0.94) for detecting mild disease.  
319

320 When comparing RETFound model performance when stratified for detecting mild versus moderate-to-  
321 severe glaucoma, significant differences are observed. At 50 epochs, the model's performance on 1000  
322 images from patients with mild glaucoma shows a mean AUC of 0.87 (95% CI: 0.787 to 0.934), whereas  
323 for moderate to severe glaucoma, the mean AUC significantly improves to 0.986 (95% CI: 0.950 to  
324 0.999). Similarly, with 2000 images, the AUC for mild glaucoma is 0.881 (95% CI: 0.791 to 0.937),  
325 compared to an AUC of 0.991 (95% CI: 0.954 to 0.999) for moderate to severe cases. Notably, even with  
326 just 200 images, the model achieved an impressive AUC of 0.965 (95% CI: 0.887 to 0.992) for moderate  
327 to severe glaucoma. These findings highlight the model's enhanced sensitivity in detecting more advanced  
328 stages of glaucoma. This may be attributed to the more pronounced structural changes in the optic nerve  
329 head and retinal nerve fiber layer in moderate-to-severe glaucoma, which are more easily recognized by  
330 the model. The subtle changes in mild glaucoma may present a greater challenge for detection, requiring  
331 higher image resolution or additional clinical features to improve model performance.

332  
333 This study also finds that the RETFound model maintains strong performance across various  
334 demographic groups, showing no statistically significant differences in AUC when stratified by race. This  
335 outcome implies that the model effectively generalizes across diverse populations, a crucial trait for its  
336 clinical use in different real-world scenarios. However, while not reaching statistical significance, our

337 results suggest that the RETFound model's performance may vary between age groups. Specifically, when  
338 trained for 50 epochs on 2000 images the model achieved an AUC of 0.95 (95% CI: 0.83 to 0.99) for  
339 subjects below 60 years of age, whereas for those above 60, the AUC was lower at 0.85 (95% CI: 0.73 to  
340 0.93). This may be due in part to differences in the severity of disease among these populations. This  
341 suggests that the model is more effective at detecting glaucoma in younger patients, potentially due to  
342 more pronounced retinal changes in younger individuals or differences in disease pathology. The ROC  
343 curve in Figure 3 further illustrates these differences, with the curve for subjects under 60 showing higher  
344 sensitivity and specificity across most thresholds compared to those over 60. This discrepancy could be  
345 due to age-related changes in retinal structures that are harder to detect in older individuals or reflect  
346 differences in the underlying disease pathology. These findings underscore the importance of considering  
347 demographic factors such as age in the development and evaluation of AI models for medical diagnostics.  
348 While the RETFound model shows promise, its varying performance across age groups highlights the  
349 need for further refinement and possibly the development of age-specific models or adjustments <sup>11</sup>.

350  
351 One limitation is that this study did not explicitly explore the impact of batch size on training dynamics,  
352 as theoretically batch size could affect gradient smoothness and convergence stability. However, initial  
353 experiments showed no significant effect on results, and relevant hyperparameters are included in  
354 Supplemental Table 2. The methodology of this study is also limited by its binary classification approach,  
355 distinguishing only between glaucoma and non-glaucoma. This simplification may not adequately capture  
356 the nuanced spectrum of ocular diseases and the variability in normal human optic nerve head structure.  
357 Enhanced diagnostic accuracy in stratifying disease severity suggests that a model with a broader range of  
358 categories that includes glaucoma suspects, or glaucomatous optic nerve damage without visual field  
359 damage, could be more beneficial for glaucoma detection.<sup>24</sup> However, a binary classification system is  
360 essential for generating referral suggestions and plays a key role in telehealth, screening, primary care,  
361 and clinical decision-making tools. Relying solely on OCT RNFL imaging also has its limitations, and  
362 incorporating additional imaging techniques or diagnostic information could enhance the model's

363 performance. Additionally, using a relatively uniform dataset in this study may limit the applicability of  
364 the results to diverse populations. These limitations are not unique to glaucoma detection and reflect  
365 broader challenges often faced when implementing AI-driven methods in ophthalmology.

366  
367 Overall, the findings underscore RETFound's adaptability and efficiency across various training  
368 configurations, demonstrating significant performance gains even with limited training samples or  
369 computational resources—common constraints in real-world clinical settings. Many healthcare facilities  
370 face challenges in acquiring large volumes of expertly labeled data and the necessary computational  
371 infrastructure for extensive model training. Models developed externally on separate data often may  
372 suffer worse performance when applied to an independent local dataset. As such, RETFound's reduced  
373 dependence on extensive labeled datasets and its ability to maintain high performance across diverse  
374 training conditions make it a viable and innovative tool for integrating AI into ophthalmological practices.  
375 Fine-tuning enables models to be adapted to specific clinical settings, patient demographics, and disease  
376 presentations, thereby optimizing their diagnostic accuracy and utility. Crucially, models can reach high  
377 performance with small dataset sizes; this study suggests fine-tuning with only 500 or even 200 images  
378 may be sufficient for accurate glaucoma detection. This study highlights the potential of foundational  
379 models trained on large, unlabeled datasets to overcome barriers to AI adoption, enhancing glaucoma  
380 detection in telehealth, primary care, community, and clinical environments.

381  
382 Future efforts will focus on integrating fundus images as well as OCT data in models to enable a  
383 multimodal approach. By combining fundus and OCT imaging for multimodal assessment of RETFound,  
384 its diagnostic potential can be further evaluated and performance may be improved. Expanding the  
385 validation study to cover a broader spectrum of eye conditions, beyond just glaucoma, to include multiple  
386 disease categories, could also greatly enhance our understanding of RETFound's flexibility and  
387 significance. Foundational AI models have the potential to significantly advance the field of  
388 ophthalmology, but they require extensive validation before they can be implemented in clinical practice.



389 Furthermore, including diverse and representative datasets in these studies will be essential for evaluating  
390 the models' real-world performance and reliability.

### 391 Bibliography

- 392 1. Weinreb RN, Aung T, Medeiros FA. The pathophysiology and treatment of glaucoma: a review.  
393 JAMA 2014;311:1901–1911.
- 394 2. Tham Y-C, Li X, Wong TY, et al. Global prevalence of glaucoma and projections of glaucoma burden  
395 through 2040: a systematic review and meta-analysis. *Ophthalmology* 2014;121:2081–2090.
- 396 3. Fujimoto JG, Drexler W, Schuman JS, Hitzenberger CK. Optical Coherence Tomography (OCT) in  
397 ophthalmology: introduction. *Opt Express* 2009;17:3978–3979.
- 398 4. Schuman JS, Hee MR, Puliafito CA, et al. Quantification of nerve fiber layer thickness in normal and  
399 glaucomatous eyes using optical coherence tomography. *Arch Ophthalmol* 1995;113:586–596.
- 400 5. Schmidt-Erfurth U, Sadeghipour A, Gerendas BS, et al. Artificial intelligence in retina. *Prog Retin Eye*  
401 *Res* 2018;67:1–29.
- 402 6. De Fauw J, Ledsam JR, Romera-Paredes B, et al. Clinically applicable deep learning for diagnosis and  
403 referral in retinal disease. *Nat Med* 2018;24:1342–1350.
- 404 7. Ting DSW, Pasquale LR, Peng L, et al. Artificial intelligence and deep learning in ophthalmology. *Br J*  
405 *Ophthalmol* 2019;103:167–175.
- 406 8. Akter N, Fletcher J, Perry S, et al. Glaucoma diagnosis using multi-feature analysis and a deep learning  
407 technique. *Sci Rep* 2022;12:8064.
- 408 9. Wu C-W, Shen H-L, Lu C-J, et al. Comparison of different machine learning classifiers for glaucoma  
409 diagnosis based on spectralis OCT. *Diagnostics (Basel)* 2021;11.
- 410 10. Ran AR, Tham CC, Chan PP, et al. Deep learning in glaucoma with optical coherence tomography: a  
411 review. *Eye* 2021;35:188–201.
- 412 11. Noury E, Mannil SS, Chang RT, et al. Deep Learning for Glaucoma Detection and Identification of  
413 Novel Diagnostic Areas in Diverse Real-World Datasets. *Transl Vis Sci Technol* 2022;11:11.
- 414 12. Christopher M, Nakahara K, Bowd C, et al. Effects of study population, labeling and training on  
415 glaucoma detection using deep learning algorithms. *Transl Vis Sci Technol* 2020;9:27.
- 416 13. Akter N, Perry S, Fletcher J, et al. Glaucoma Detection and Feature Visualization from OCT Images  
417 Using Deep Learning. *medRxiv* 2023.
- 418 14. Asaoka R, Murata H, Hirasawa K, et al. Using Deep Learning and Transfer Learning to Accurately  
419 Diagnose Early-Onset Glaucoma From Macular Optical Coherence Tomography Images. *Am J*  
420 *Ophthalmol* 2019;198:136–145.
- 421 15. Ashtari-Majlan M, Dehshibi MM, Masip D. Deep Learning and Computer Vision for Glaucoma  
422 Detection: A Review. *arXiv preprint arXiv:230716528* 2023.
- 423 16. Rani V, Nabi ST, Kumar M, et al. Self-supervised Learning: A Succinct Review. *Arch Comput*  
424 *Methods Eng* 2023;30:2761–2775.



- 425 17. He K, Fan H, Wu Y, et al. Momentum contrast for unsupervised visual representation learning. In:  
426 2020 IEEE/CVF Conference on Computer Vision and Pattern Recognition (CVPR). IEEE; 2020:9726–  
427 9735.
- 428 18. Chen T, Kornblith S, Norouzi M, Hinton G. A simple framework for contrastive learning of visual  
429 representations. *International conference on machine learning* 2020:1597.
- 430 19. Caron M, Touvron H, Misra I, et al. Emerging Properties in Self-Supervised Vision Transformers. In:  
431 2021 IEEE/CVF International Conference on Computer Vision (ICCV). IEEE; 2021:9630–9640.
- 432 20. Ye Z. SSL-DG: Rethinking and Fusing Semi-supervised Learning and Domain Generalization in  
433 Medical Image Segmentation. arXiv preprint arXiv:231102583 2023.
- 434 21. Tayebi Arasteh S, Misera L, Kather JN, et al. Enhancing diagnostic deep learning via self-supervised  
435 pretraining on large-scale, unlabeled non-medical images. *Eur Radiol Exp* 2024;8:10.
- 436 22. Denner S, Zimmerer D, Bounias D, et al. Leveraging foundation models for content-based medical  
437 image retrieval in radiology. arXiv preprint arXiv:240306567 2024.
- 438 23. Pai S, Bontempi D, Hadzic I, et al. Foundation model for cancer imaging biomarkers. *Nat Mach Intell*  
439 2024;6:354–367.
- 440 24. Zhou Y, Chia MA, Wagner SK, et al. A foundation model for generalizable disease detection from  
441 retinal images. *Nature* 2023;622:156–163.
- 442 25. Sample PA, Medeiros FA, Racette L, et al. Identifying glaucomatous vision loss with visual-function-  
443 specific perimetry in the diagnostic innovations in glaucoma study. *Invest Ophthalmol Vis Sci*  
444 2006;47:3381–3389.
- 445 26. Sample PA, Girkin CA, Zangwill LM, et al. The African Descent and Glaucoma Evaluation Study  
446 (ADAGES): design and baseline data. *Arch Ophthalmol* 2009;127:1136–1145.
- 447 27. Fan R, Bowd C, Christopher M, et al. Detecting glaucoma in the ocular hypertension study using deep  
448 learning. *JAMA Ophthalmol* 2022;140:383–391.
- 449 28. Christopher M, Bowd C, Walker E, et al. Comparison of Deep Learning Glaucoma Detection Using  
450 Optic Nerve Head Fundus Photos and Optical Coherence Tomography. *Investigative Ophthalmology &*  
451 *Visual Science* 2022;63.
- 452 29. Huynh J, Gonzalez R, Walker E, et al. Multimodal Transformer Model to Detect Glaucoma from  
453 OCT and Retinal Nerve Fiber Layer (RNFL) Thickness. *Investigative Ophthalmology & Visual Science*  
454 2023;64:362–362.
- 455 30. Christopher M, Belghith A, Weinreb RN, et al. Retinal nerve fiber layer features identified by  
456 unsupervised machine learning on optical coherence tomography scans predict glaucoma progression.  
457 *Invest Ophthalmol Vis Sci* 2018;59:2748–2756.
- 458 31. Liu H, Li L, Wormstone IM, et al. Development and validation of a deep learning system to detect  
459 glaucomatous optic neuropathy using fundus photographs. *JAMA Ophthalmol* 2019;137:1353–1360.
- 460 32. Christopher M, Bowd C, Proudfoot JA, et al. Performance of Deep Learning Models to Detect  
461 Glaucoma Using Unsegmented Radial and Circle OCT Scans of the Optic Nerve Head. *Investigative*  
462 *Ophthalmology & Visual Science* 2021;62:1014–1014.

463

464 **Figures**

465 **Figure 1:** Diagram showing model workflow, involving OCT preprocessing, fine-tuning runs, &  
466 bootstraps.

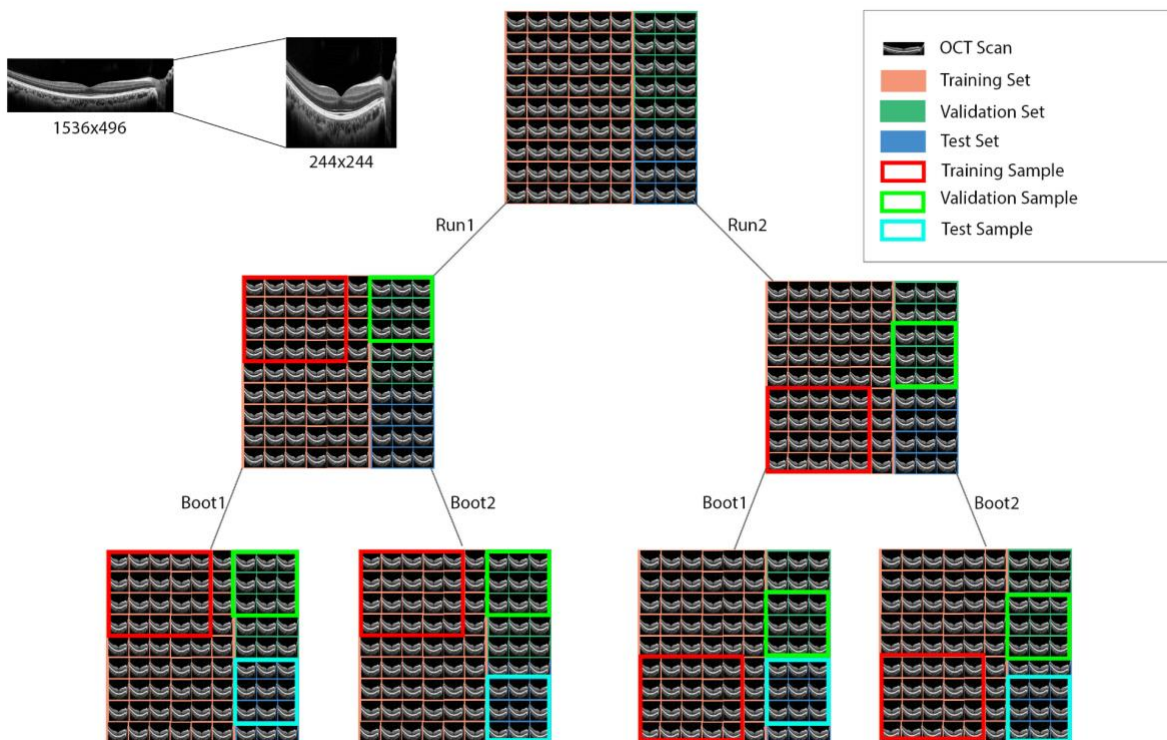

467

468

469 **Figure 2:** Plots demonstrating the relationship between number of images (x) vs and performance, as measured by  
470 Area under the receiver operating characteristic curve (AUC) (y), at each tested epoch number.

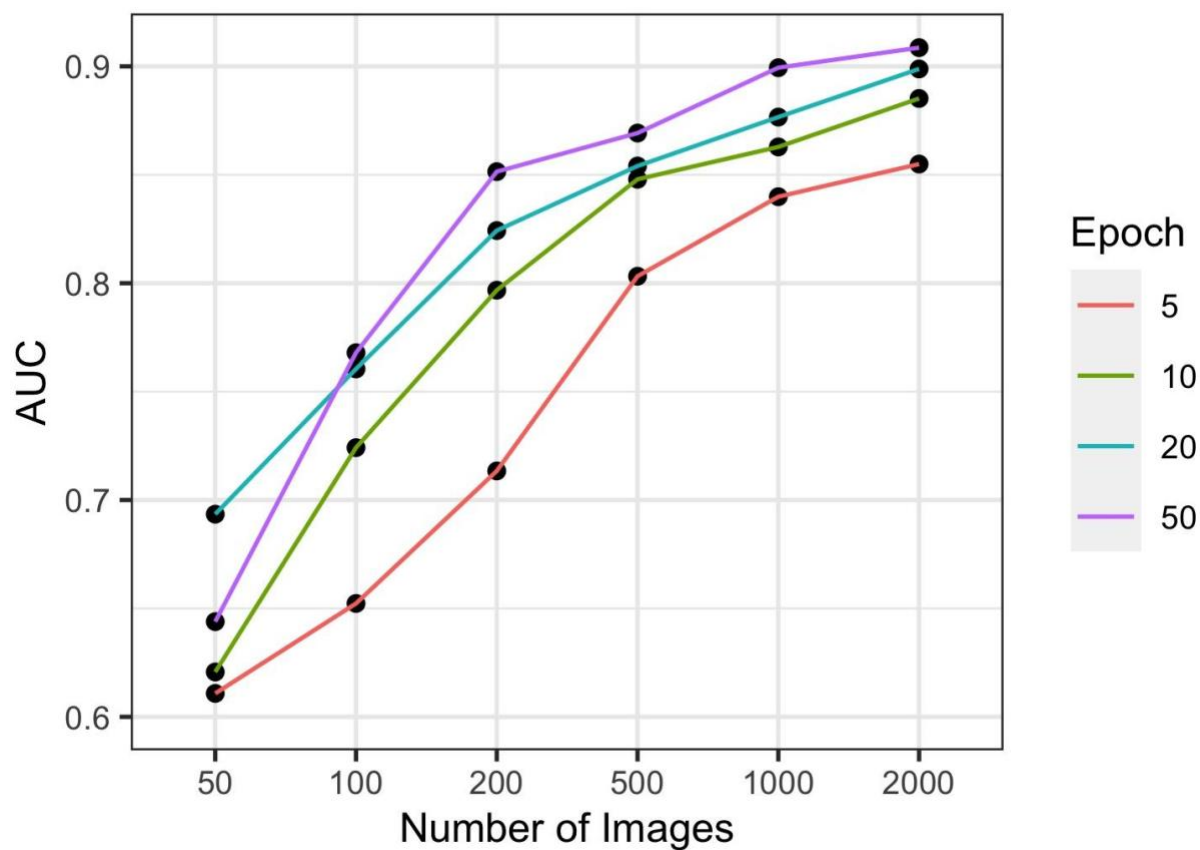

471

472

473 **Figure 3:** Best performing RETFound models for age, race, and severity of glaucoma. Area under the receiver  
474 operating characteristic curve (AUC) curves are stratified by Glaucoma Severity (left: Mild, Moderate-to-severe),  
475 Age (middle: >60y, <60y) and Race (right: African Descent, Other). The best performing model was defined as the  
476 model with the highest combined (AUC), fine-tuned from a single training run with 2000 images.

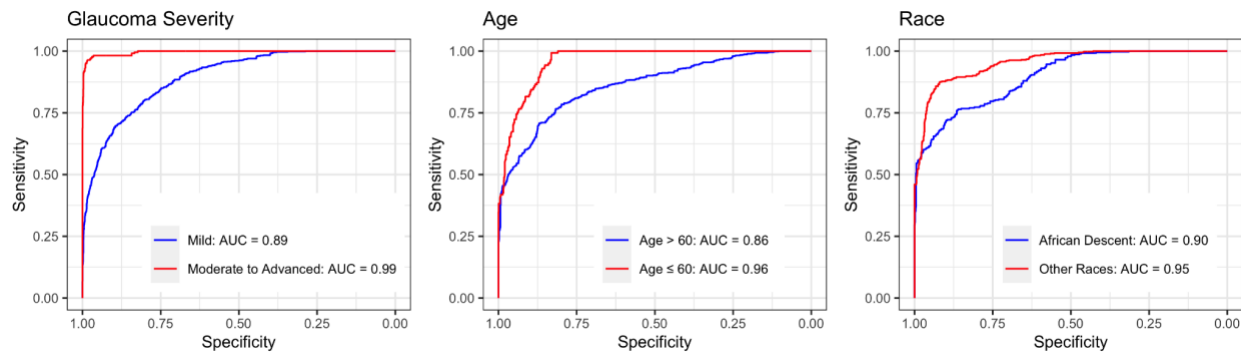

477

478

479 **Tables**

480 **Table 1:** Overview of all Cohorts

|                                           | Overall (n = 747 subjects; 1231 eyes; 15216 images) | Training (n = 512 subjects; 812 eyes; 10708 images) | Validation (n = 99 subjects; 167 eyes; 1497 images) | Testing (n = 212 subjects; 356 eyes; 3011 images) |
|-------------------------------------------|-----------------------------------------------------|-----------------------------------------------------|-----------------------------------------------------|---------------------------------------------------|
| Age                                       | 60.3 (59.2, 61.4)                                   | 61.7 (60.4, 63.0)                                   | 54.8 (51.4, 58.2)                                   | 58.1 (56.1, 60.1)                                 |
| Age Classification                        |                                                     |                                                     |                                                     |                                                   |
| Age < 60                                  | 335 (44.8%)                                         | 205 (40.0%)                                         | 60 (60.6%)                                          | 114 (53.8%)                                       |
| Age > 60                                  | 412 (55.2%)                                         | 307 (60.0%)                                         | 39 (39.4%)                                          | 98 (46.2%)                                        |
| Sex                                       |                                                     |                                                     |                                                     |                                                   |
| Female                                    | 438 (58.6%)                                         | 282 (55.1%)                                         | 65 (65.7%)                                          | 134 (63.2%)                                       |
| Male                                      | 309 (41.4%)                                         | 230 (44.9%)                                         | 34 (34.3%)                                          | 78 (36.8%)                                        |
| Race                                      |                                                     |                                                     |                                                     |                                                   |
| American Indian/ Alaska Native            | 2 (0.3%)                                            | 1 (0.2%)                                            | 0 (0.0%)                                            | 1 (0.5%)                                          |
| Asian                                     | 29 (3.9%)                                           | 23 (4.5%)                                           | 3 (3.0%)                                            | 3 (1.4%)                                          |
| Black or African American                 | 282 (37.8%)                                         | 185 (36.1%)                                         | 31 (31.3%)                                          | 104 (49.1%)                                       |
| Native Hawaiian or Other Pacific Islander | 3 (0.4%)                                            | 3 (0.6%)                                            | 0 (0.0%)                                            | 0 (0.0%)                                          |
| Unknown or Not Reported                   | 6 (0.8%)                                            | 4 (0.8%)                                            | 2 (2.0%)                                            | 0 (0.0%)                                          |
| White                                     | 425 (56.9%)                                         | 296 (57.8%)                                         | 63 (63.6%)                                          | 104 (49.1%)                                       |
| Ethnicity                                 |                                                     |                                                     |                                                     |                                                   |
| Hispanic                                  | 18 (2.4%)                                           | 13 (2.5%)                                           | 5 (5.1%)                                            | 3 (1.4%)                                          |
| Not Hispanic                              | 647 (86.6%)                                         | 446 (87.1%)                                         | 82 (82.8%)                                          | 181 (85.4%)                                       |
| Unknown or Not Reported                   | 82 (11.0%)                                          | 53 (10.4%)                                          | 12 (12.1%)                                          | 28 (13.2%)                                        |
| Diabetes                                  |                                                     |                                                     |                                                     |                                                   |
| No                                        | 652 (87.3%)                                         | 437 (85.4%)                                         | 93 (93.9%)                                          | 189 (89.2%)                                       |
| Yes                                       | 95 (12.7%)                                          | 75 (14.6%)                                          | 6 (6.1%)                                            | 23 (10.8%)                                        |
| Hypertension                              |                                                     |                                                     |                                                     |                                                   |
| No                                        | 463 (62.0%)                                         | 299 (58.4%)                                         | 68 (68.7%)                                          | 142 (67.0%)                                       |
| Yes                                       | 284 (38.0%)                                         | 213 (41.6%)                                         | 31 (31.3%)                                          | 70 (33.0%)                                        |
| 24-2 VF MD (dB)                           | -3.31 (-3.71, -2.92)                                | -4.10 (-4.62, -3.59)                                | -1.61 (-2.42, -0.80)                                | -1.08 (-1.54, -0.63)                              |
| Baseline Disease Severity                 |                                                     |                                                     |                                                     |                                                   |
| Mild Glaucoma                             | 379 (30.8%)                                         | 313 (37.9%)                                         | 25 (15.0%)                                          | 41 (11.5%)                                        |
| Moderate-to-severe Glaucoma               | 226 (18.4%)                                         | 195 (23.6%)                                         | 13 (7.8%)                                           | 18 (5.1%)                                         |
| Non-Glaucomatous                          | 626 (50.9%)                                         | 317 (38.4%)                                         | 129 (77.2%)                                         | 297 (83.4%)                                       |
| Axial Length (mm)                         | 23.9 (23.9, 24.0)                                   | 24.0 (23.9, 24.1)                                   | 23.7 (23.5, 24.0)                                   | 23.8 (23.7, 24.0)                                 |
| Spherical Equivalent                      | -0.51 (-0.64, -0.38)                                | -0.58 (-0.74, -0.42)                                | -0.58 (-0.90, -0.26)                                | -0.31 (-0.55, -0.07)                              |
| IOP (mmHg)                                | 14.7 (14.4, 14.9)                                   | 14.7 (14.4, 15.1)                                   | 14.6 (14.1, 15.2)                                   | 14.6 (14.2, 15.0)                                 |
| CCT (µm)                                  | 539 (536, 542)                                      | 539 (535, 542)                                      | 544 (536, 552)                                      | 538 (533, 543)                                    |
| Baseline Visit Glaucoma Classification    |                                                     |                                                     |                                                     |                                                   |
| GVFD & GON                                | 605 (49.1%)                                         | 508 (61.6%)                                         | 38 (22.8%)                                          | 59 (16.6%)                                        |
| Non-glaucomatous                          | 626 (50.9%)                                         | 317 (38.4%)                                         | 129 (77.2%)                                         | 297 (83.4%)                                       |
| Last Visit Glaucoma Classification        |                                                     |                                                     |                                                     |                                                   |
| GVFD & GON                                | 605 (49.1%)                                         | 508 (61.6%)                                         | 38 (22.8%)                                          | 59 (16.6%)                                        |
| Non-glaucomatous                          | 626 (50.9%)                                         | 317 (38.4%)                                         | 129 (77.2%)                                         | 297 (83.4%)                                       |

481 IOP: intraocular pressure, CCT: central corneal thickness, VF: visual field, MD: mean deviation

482 \*Number of patients when stratified by characteristic may not sum to total (2104 for "All"); this remainder were unreported for the characteristic

483 of interest.

484 \*\*Age of 5 subjects progressed past 60y during the study; these are here reported at baseline age <60y.

485

486 **Table 2:** Summary of the model performance on the local datasets as captured by AUC, with 95% confidence  
 487 intervals. The number of images represents the sum of images used for training and validation. Stratified by Age,  
 488 Disease Severity, and Race.

| Epoch | Number of Images | Overall (n = 212 subjects; 356 eyes; 3011 images) | Age                                                    |                                                        | Disease Severity                                     |                                                                    | Race                                                                |                                                       |
|-------|------------------|---------------------------------------------------|--------------------------------------------------------|--------------------------------------------------------|------------------------------------------------------|--------------------------------------------------------------------|---------------------------------------------------------------------|-------------------------------------------------------|
|       |                  |                                                   | Age Below 60 (n = 114 subjects; 196 eyes; 1421 images) | Age Above 60 (n = 101 subjects; 164 eyes; 1590 images) | Mild Glaucoma (n = 29 subjects; 43 eyes; 666 images) | Moderate-to-severe Glaucoma (n = 19 subjects; 27 eyes; 221 images) | Black or African American (n = 104 subjects; 172 eyes; 1425 images) | Other Races (n = 108 subjects; 184 eyes; 1586 images) |
| 5     | 50               | 0.61 (0.44, 0.70)                                 | 0.59 (0.37, 0.69)                                      | 0.61 (0.50, 0.71)                                      | 0.60 (0.44, 0.69)                                    | 0.64 (0.41, 0.76)                                                  | 0.61 (0.40, 0.75)                                                   | 0.61 (0.43, 0.71)                                     |
| 5     | 100              | 0.65 (0.56, 0.73)                                 | 0.60 (0.42, 0.71)                                      | 0.65 (0.57, 0.74)                                      | 0.64 (0.55, 0.72)                                    | 0.70 (0.55, 0.79)                                                  | 0.63 (0.52, 0.76)                                                   | 0.66 (0.57, 0.76)                                     |
| 5     | 200              | 0.71 (0.64, 0.79)                                 | 0.67 (0.57, 0.79)                                      | 0.68 (0.59, 0.77)                                      | 0.69 (0.61, 0.76)                                    | 0.80 (0.71, 0.88)                                                  | 0.70 (0.59, 0.83)                                                   | 0.72 (0.63, 0.79)                                     |
| 5     | 500              | 0.80 (0.71, 0.87)                                 | 0.78 (0.67, 0.88)                                      | 0.75 (0.62, 0.85)                                      | 0.76 (0.67, 0.83)                                    | 0.93 (0.85, 0.97)                                                  | 0.80 (0.66, 0.92)                                                   | 0.80 (0.70, 0.87)                                     |
| 5     | 1000             | 0.84 (0.76, 0.91)                                 | 0.81 (0.64, 0.93)                                      | 0.79 (0.67, 0.89)                                      | 0.80 (0.72, 0.88)                                    | 0.96 (0.91, 0.99)                                                  | 0.82 (0.67, 0.94)                                                   | 0.85 (0.77, 0.91)                                     |
| 5     | 2000             | 0.86 (0.78, 0.92)                                 | 0.84 (0.69, 0.96)                                      | 0.80 (0.68, 0.89)                                      | 0.82 (0.74, 0.90)                                    | 0.97 (0.93, 0.99)                                                  | 0.84 (0.69, 0.95)                                                   | 0.87 (0.79, 0.93)                                     |
| 10    | 50               | 0.62 (0.44, 0.72)                                 | 0.60 (0.37, 0.70)                                      | 0.62 (0.51, 0.73)                                      | 0.61 (0.44, 0.71)                                    | 0.66 (0.41, 0.79)                                                  | 0.61 (0.41, 0.75)                                                   | 0.62 (0.44, 0.74)                                     |
| 10    | 100              | 0.72 (0.63, 0.81)                                 | 0.68 (0.53, 0.83)                                      | 0.68 (0.57, 0.77)                                      | 0.69 (0.60, 0.77)                                    | 0.83 (0.67, 0.93)                                                  | 0.71 (0.58, 0.87)                                                   | 0.73 (0.63, 0.81)                                     |
| 10    | 200              | 0.80 (0.71, 0.87)                                 | 0.78 (0.65, 0.90)                                      | 0.74 (0.59, 0.85)                                      | 0.75 (0.66, 0.84)                                    | 0.93 (0.83, 0.97)                                                  | 0.79 (0.64, 0.91)                                                   | 0.80 (0.68, 0.88)                                     |
| 10    | 500              | 0.85 (0.78, 0.91)                                 | 0.82 (0.64, 0.93)                                      | 0.79 (0.67, 0.88)                                      | 0.81 (0.73, 0.88)                                    | 0.96 (0.91, 0.99)                                                  | 0.83 (0.69, 0.93)                                                   | 0.87 (0.79, 0.92)                                     |
| 10    | 1000             | 0.86 (0.79, 0.92)                                 | 0.85 (0.70, 0.96)                                      | 0.80 (0.69, 0.90)                                      | 0.83 (0.74, 0.90)                                    | 0.97 (0.92, 0.99)                                                  | 0.84 (0.71, 0.96)                                                   | 0.89 (0.80, 0.94)                                     |
| 10    | 2000             | 0.89 (0.81, 0.94)                                 | 0.89 (0.71, 0.97)                                      | 0.82 (0.71, 0.92)                                      | 0.85 (0.78, 0.92)                                    | 0.98 (0.93, 1.00)                                                  | 0.87 (0.74, 0.97)                                                   | 0.91 (0.82, 0.96)                                     |
| 20    | 50               | 0.69 (0.46, 0.79)                                 | 0.64 (0.41, 0.76)                                      | 0.67 (0.51, 0.77)                                      | 0.67 (0.45, 0.76)                                    | 0.77 (0.43, 0.89)                                                  | 0.68 (0.45, 0.83)                                                   | 0.71 (0.44, 0.80)                                     |
| 20    | 100              | 0.76 (0.64, 0.85)                                 | 0.72 (0.57, 0.86)                                      | 0.72 (0.59, 0.82)                                      | 0.72 (0.62, 0.81)                                    | 0.88 (0.68, 0.96)                                                  | 0.75 (0.61, 0.89)                                                   | 0.77 (0.63, 0.87)                                     |
| 20    | 200              | 0.82 (0.73, 0.90)                                 | 0.82 (0.67, 0.92)                                      | 0.76 (0.64, 0.88)                                      | 0.78 (0.68, 0.87)                                    | 0.96 (0.89, 0.99)                                                  | 0.81 (0.66, 0.93)                                                   | 0.83 (0.72, 0.91)                                     |
| 20    | 500              | 0.85 (0.78, 0.91)                                 | 0.83 (0.67, 0.94)                                      | 0.80 (0.68, 0.89)                                      | 0.82 (0.73, 0.89)                                    | 0.97 (0.92, 0.99)                                                  | 0.84 (0.69, 0.94)                                                   | 0.87 (0.79, 0.93)                                     |
| 20    | 1000             | 0.88 (0.80, 0.93)                                 | 0.88 (0.72, 0.97)                                      | 0.81 (0.69, 0.90)                                      | 0.84 (0.76, 0.91)                                    | 0.98 (0.92, 0.100)                                                 | 0.85 (0.70, 0.95)                                                   | 0.90 (0.83, 0.96)                                     |
| 20    | 2000             | 0.90 (0.82, 0.94)                                 | 0.91 (0.76, 0.98)                                      | 0.84 (0.73, 0.92)                                      | 0.87 (0.78, 0.93)                                    | 0.99 (0.94, 1.00)                                                  | 0.88 (0.73, 0.97)                                                   | 0.93 (0.85, 0.97)                                     |
| 50    | 50               | 0.64 (0.43, 0.80)                                 | 0.63 (0.40, 0.81)                                      | 0.64 (0.48, 0.80)                                      | 0.62 (0.43, 0.76)                                    | 0.71 (0.42, 0.94)                                                  | 0.64 (0.41, 0.85)                                                   | 0.64 (0.41, 0.81)                                     |
| 50    | 100              | 0.77 (0.48, 0.84)                                 | 0.74 (0.38, 0.88)                                      | 0.72 (0.57, 0.84)                                      | 0.73 (0.49, 0.81)                                    | 0.88 (0.41, 0.95)                                                  | 0.75 (0.46, 0.89)                                                   | 0.78 (0.48, 0.86)                                     |
| 50    | 200              | 0.85 (0.77, 0.91)                                 | 0.85 (0.71, 0.96)                                      | 0.79 (0.66, 0.89)                                      | 0.81 (0.72, 0.88)                                    | 0.97 (0.89, 0.99)                                                  | 0.83 (0.70, 0.94)                                                   | 0.87 (0.78, 0.93)                                     |
| 50    | 500              | 0.87 (0.77, 0.93)                                 | 0.87 (0.72, 0.98)                                      | 0.81 (0.67, 0.90)                                      | 0.83 (0.72, 0.91)                                    | 0.98 (0.93, 1.00)                                                  | 0.85 (0.69, 0.95)                                                   | 0.89 (0.76, 0.95)                                     |
| 50    | 1000             | 0.90 (0.83, 0.95)                                 | 0.92 (0.80, 0.99)                                      | 0.84 (0.72, 0.92)                                      | 0.87 (0.79, 0.93)                                    | 0.99 (0.95, 1.00)                                                  | 0.89 (0.75, 0.97)                                                   | 0.92 (0.83, 0.97)                                     |
| 50    | 2000             | 0.91 (0.83, 0.95)                                 | 0.95 (0.83, 0.99)                                      | 0.85 (0.73, 0.93)                                      | 0.88 (0.79, 0.94)                                    | 0.99 (0.95, 1.00)                                                  | 0.90 (0.76, 0.98)                                                   | 0.93 (0.84, 0.97)                                     |

489

490 **Supplemental Figures**

491 **Supplemental Figure 1:** Plots demonstrating the relationship between number of images (x) vs and performance, as

492 measured by AUC (y), at each tested epoch number. Dashed lines correspond to the range of 95% Cis.

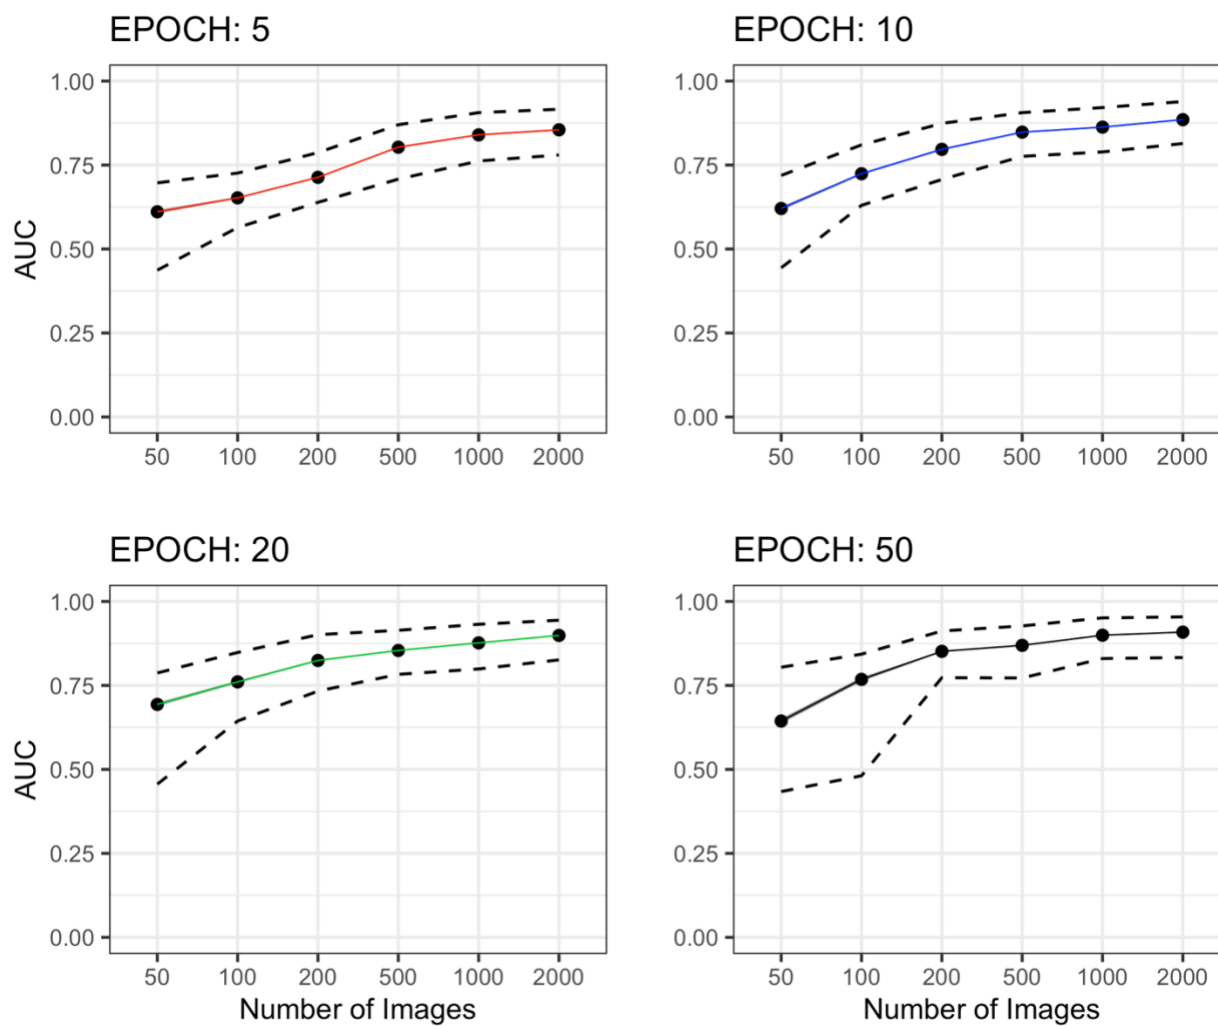

493  
494

495 **Supplemental Figure 2:** Plots of the relationship between number of epochs (x) and diagnostic performance, as  
496 measured by area under the receiver operating characteristic curve (AUC, y), at each tested dataset sample size.  
497 Dashed lines correspond to the range of 95% CIs.

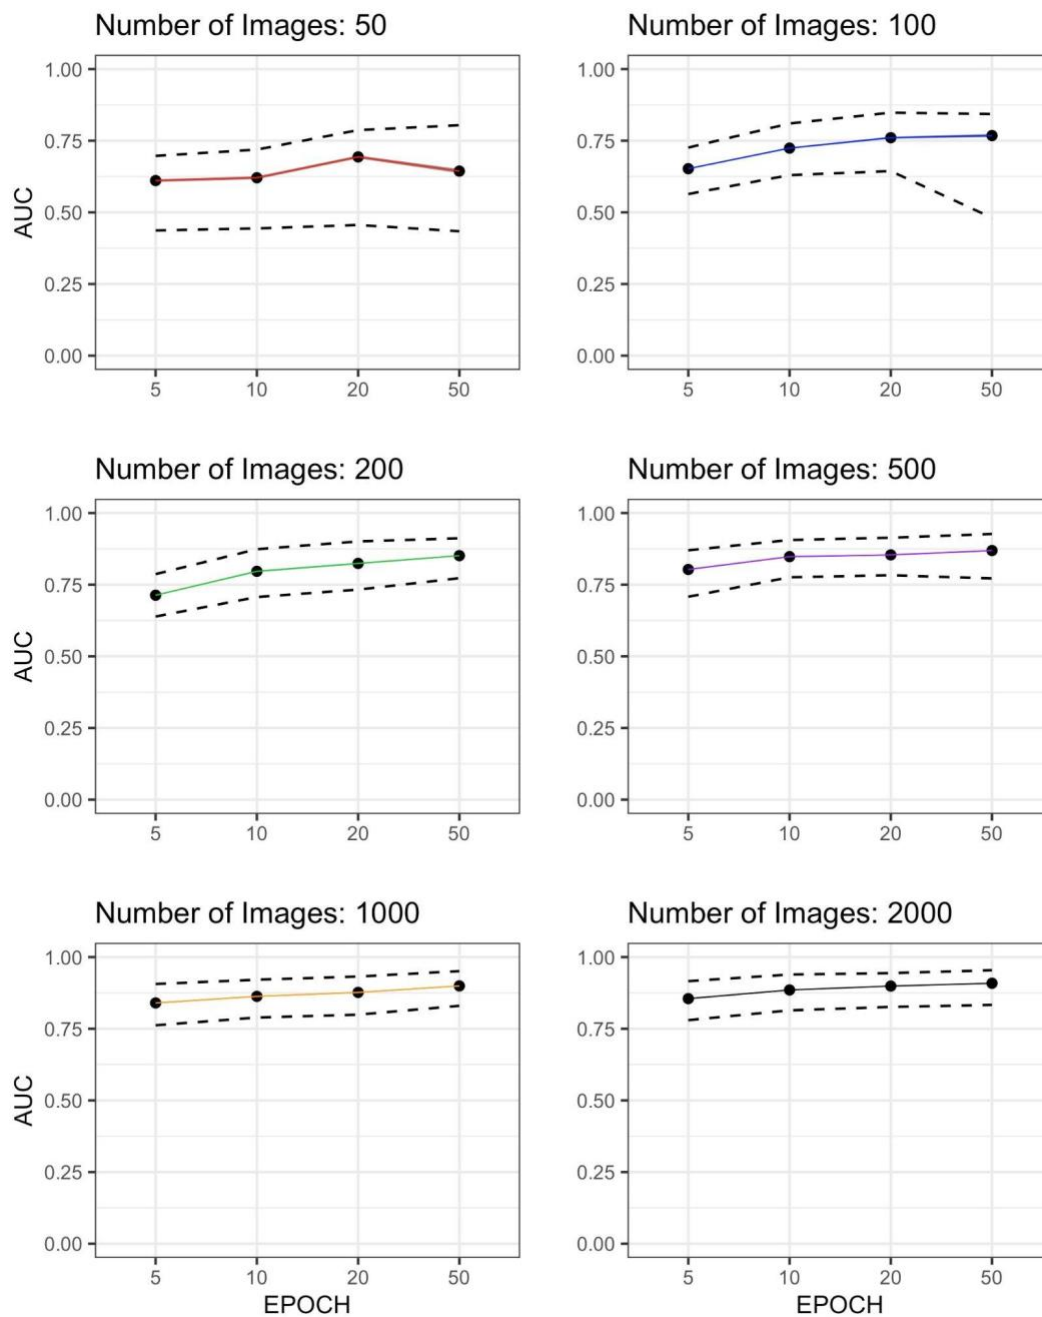

498

499



500 **Supplemental Figure 3:** Bar Plots of mean area under the receiver operating characteristic curve (AUC)

501 values for 50 epochs, 2000 training/validation images Stratified by Age (<60 years, ≥60 years), glaucoma

502 severity (Mild, Moderate-to-severe) and race (African Descent, Other), with confidence intervals.

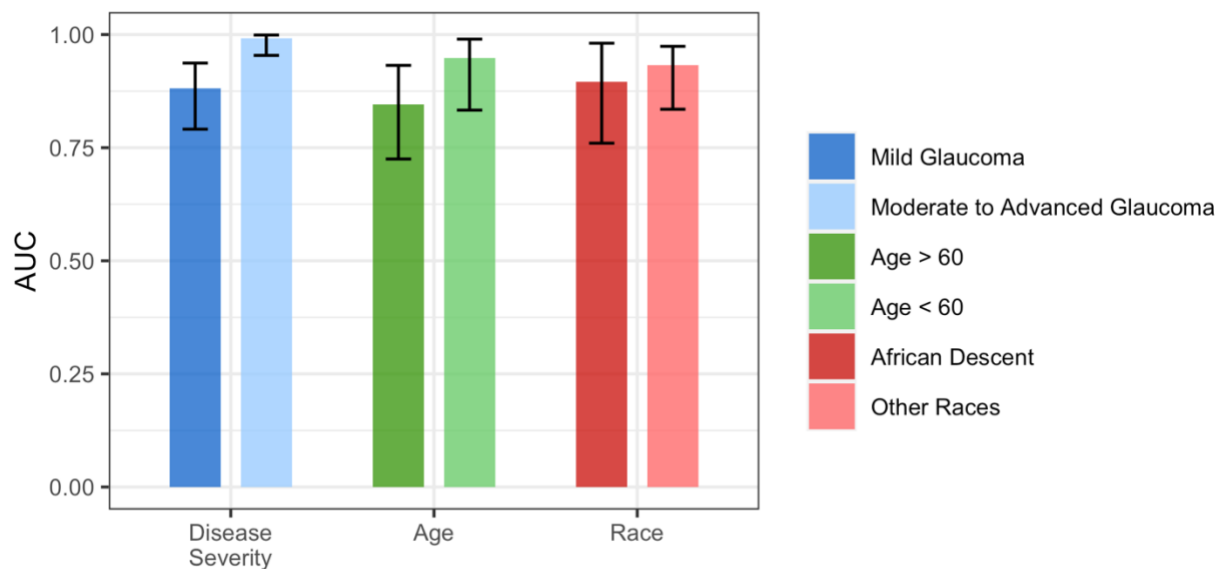

503

504

505

506 **Supplemental Tables**

507 Supplemental Table 1

|                                           | Disease Severity                           |                                                            | Age                                   |                                       | Race                            |                                         |
|-------------------------------------------|--------------------------------------------|------------------------------------------------------------|---------------------------------------|---------------------------------------|---------------------------------|-----------------------------------------|
|                                           | Mild Glaucoma (n = 258 subjects; 379 eyes) | Moderate to Advanced Glaucoma (n = 140 subjects; 226 eyes) | Age < 60 (n = 335 subjects; 576 eyes) | Age > 60 (n = 412 subjects; 655 eyes) | AD (n = 282 subjects; 454 eyes) | Other Race (n = 465 subjects; 777 eyes) |
| Age                                       | 67.7 (66.2, 69.1)                          | 67.0 (64.9, 69.1)                                          | 46.3 (45.1, 47.4)                     | 71.7 (71.0, 72.4)                     | 59.8 (58.2, 61.4)               | 60.6 (59.0, 62.1)                       |
| Age Classification                        |                                            |                                                            |                                       |                                       |                                 |                                         |
| Age < 60                                  | 60 (23.3%)                                 | 36 (25.7%)                                                 | 335 (100.0%)                          | 0 (0.0%)                              | 142 (50.4%)                     | 193 (41.5%)                             |
| Age > 60                                  | 198 (76.7%)                                | 104 (74.3%)                                                | 0 (0.0%)                              | 412 (100.0%)                          | 140 (49.6%)                     | 272 (58.5%)                             |
| Sex                                       |                                            |                                                            |                                       |                                       |                                 |                                         |
| Female                                    | 146 (56.6%)                                | 67 (47.9%)                                                 | 198 (59.1%)                           | 240 (58.3%)                           | 179 (63.5%)                     | 259 (55.7%)                             |
| Male                                      | 112 (43.4%)                                | 73 (52.1%)                                                 | 137 (40.9%)                           | 172 (41.7%)                           | 103 (36.5%)                     | 206 (44.3%)                             |
| Race                                      |                                            |                                                            |                                       |                                       |                                 |                                         |
| American Indian/ Alaska Native            | 0 (0.0%)                                   | 1 (0.7%)                                                   | 2 (0.6%)                              | 0 (0.0%)                              | 0 (0.0%)                        | 2 (0.4%)                                |
| Asian                                     | 10 (3.9%)                                  | 12 (8.6%)                                                  | 17 (5.1%)                             | 12 (2.9%)                             | 0 (0.0%)                        | 29 (6.2%)                               |
| Black or African American                 | 89 (34.5%)                                 | 48 (34.3%)                                                 | 142 (42.4%)                           | 140 (34.0%)                           | 282 (100.0%)                    | 0 (0.0%)                                |
| Native Hawaiian or Other Pacific Islander | 2 (0.8%)                                   | 0 (0.0%)                                                   | 1 (0.3%)                              | 2 (0.5%)                              | 0 (0.0%)                        | 3 (0.6%)                                |
| Unknown or Not Reported                   | 2 (0.8%)                                   | 0 (0.0%)                                                   | 5 (1.5%)                              | 1 (0.2%)                              | 0 (0.0%)                        | 6 (1.3%)                                |
| White                                     | 155 (60.1%)                                | 79 (56.4%)                                                 | 168 (50.1%)                           | 257 (62.4%)                           | 0 (0.0%)                        | 425 (91.4%)                             |
| Ethnicity                                 |                                            |                                                            |                                       |                                       |                                 |                                         |
| Hispanic                                  | 5 (1.9%)                                   | 3 (2.1%)                                                   | 12 (3.6%)                             | 6 (1.5%)                              | 4 (1.4%)                        | 14 (3.0%)                               |
| Not Hispanic                              | 237 (91.9%)                                | 123 (87.9%)                                                | 267 (79.7%)                           | 380 (92.2%)                           | 267 (94.7%)                     | 380 (81.7%)                             |
| Unknown or Not Reported                   | 16 (6.2%)                                  | 14 (10.0%)                                                 | 56 (16.7%)                            | 26 (6.3%)                             | 11 (3.9%)                       | 71 (15.3%)                              |
| Diabetes                                  |                                            |                                                            |                                       |                                       |                                 |                                         |
| No                                        | 207 (80.2%)                                | 120 (85.7%)                                                | 306 (91.3%)                           | 346 (84.0%)                           | 218 (77.3%)                     | 434 (93.3%)                             |
| Yes                                       | 51 (19.8%)                                 | 20 (14.3%)                                                 | 29 (8.7%)                             | 66 (16.0%)                            | 64 (22.7%)                      | 31 (6.7%)                               |
| Hypertension                              |                                            |                                                            |                                       |                                       |                                 |                                         |
| No                                        | 124 (48.1%)                                | 68 (48.6%)                                                 | 260 (77.6%)                           | 203 (49.3%)                           | 151 (53.5%)                     | 312 (67.1%)                             |
| Yes                                       | 134 (51.9%)                                | 72 (51.4%)                                                 | 75 (22.4%)                            | 209 (50.7%)                           | 131 (46.5%)                     | 153 (32.9%)                             |
| 24-2 VF MD (dB)                           | -2.40 (-2.83, -1.98)                       | -13.52 (-14.08, -12.96)                                    | -1.84 (-2.41, -1.28)                  | -4.53 (-5.05, -4.01)                  | -3.34 (-3.99, -2.69)            | -3.30 (-3.80, -2.80)                    |
| Baseline Disease Severity                 |                                            |                                                            |                                       |                                       |                                 |                                         |
| Mild Glaucoma                             | 379 (100.0%)                               | 0 (0.0%)                                                   | 89 (15.5%)                            | 290 (44.3%)                           | 131 (28.9%)                     | 248 (31.9%)                             |
| Moderate to Advanced Glaucoma             | 0 (0.0%)                                   | 226 (100.0%)                                               | 55 (9.5%)                             | 171 (26.1%)                           | 71 (15.6%)                      | 155 (19.9%)                             |
| Non-Glaucomatous                          | 0 (0.0%)                                   | 0 (0.0%)                                                   | 432 (75.0%)                           | 194 (29.6%)                           | 252 (55.5%)                     | 374 (48.1%)                             |
| Axial Length (mm)                         | 24.1 (23.9, 24.2)                          | 24.1 (24.0, 24.3)                                          | 24.0 (23.8, 24.1)                     | 23.9 (23.8, 24.0)                     | 23.8 (23.7, 23.9)               | 24.0 (23.9, 24.1)                       |
| Spherical Equivalent                      | -0.4 (-0.6, -0.2)                          | -0.8 (-1.0, -0.5)                                          | -1.01 (-1.20, -0.83)                  | -0.10 (-0.27, 0.07)                   | -0.22 (-0.43, -0.01)            | -0.69 (-0.85, -0.53)                    |
| IOP (mmHg)                                | 15.3 (14.8, 15.8)                          | 13.3 (12.7, 13.9)                                          | 14.9 (14.5, 15.3)                     | 14.5 (14.1, 14.8)                     | 15.2 (14.8, 15.6)               | 14.4 (14.0, 14.7)                       |
| CCT (µm)                                  | 536 (532, 541)                             | 532 (527, 537)                                             | 544 (539, 548)                        | 536 (532, 540)                        | 531 (526, 536)                  | 544 (540, 548)                          |
| Baseline Visit Glaucoma Classification    |                                            |                                                            |                                       |                                       |                                 |                                         |
| GVFD & GON                                | 379 (100.0%)                               | 226 (100.0%)                                               | 144 (25.0%)                           | 461 (70.4%)                           | 202 (44.5%)                     | 403 (51.9%)                             |
| Non-glaucomatous                          | 0 (0.0%)                                   | 0 (0.0%)                                                   | 432 (75.0%)                           | 194 (29.6%)                           | 252 (55.5%)                     | 374 (48.1%)                             |
| Last Visit Glaucoma Classification        |                                            |                                                            |                                       |                                       |                                 |                                         |
| GVFD & GON                                | 379 (100.0%)                               | 226 (100.0%)                                               | 144 (25.0%)                           | 461 (70.4%)                           | 202 (44.5%)                     | 403 (51.9%)                             |
| Non-glaucomatous                          | 0 (0.0%)                                   | 0 (0.0%)                                                   | 432 (75.0%)                           | 194 (29.6%)                           | 252 (55.5%)                     | 374 (48.1%)                             |

509 Supplemental Table 2

| <b>Parameter</b> | <b>Train Command Value</b> |
|------------------|----------------------------|
| Processing Unit  | A40                        |
| Mode             | Training                   |
| Optimizer        | AdamW                      |
| --nproc_per_node | 1                          |
| --batch_size     | 16                         |
| --world_size     | 1                          |
| --model          | vit_large_patch16          |
| --epochs         | EPOCH                      |
| --blr            | 5e-3                       |
| --layer_decay    | 0.65                       |
| --weight_decay   | 0.05                       |
| --drop_path      | 0.2                        |
| --nb_classes     | 2                          |
| --input_size     | 244                        |

510
